# Supplementary material for: Mechanochemically Synthesized Chalcogenide Cu3BiS3 Nanocrystals in an Environmentally Friendly Manner for Solar Cell Applications
Source: MDPI journal article supplement (doi:10.3390/cryst13030487), 2023-03-11
Supplement: s1 [file s1]

## Supplementary materials

# Mechanochemically Synthesized Chalcogenide $\text{Cu}_3\text{BiS}_3$ Nanocrystals in an Environmentally Friendly Manner for Solar Cells Applications

Erika Dutková <sup>1,\*</sup>, Matej Baláž <sup>1</sup>, María Jesús Sayagués <sup>2</sup>, Jaroslav Kováč <sup>3</sup> and Jaroslav Kováč, Jr. <sup>3</sup>

<sup>1</sup> Department of Mechanochemistry, Institute of Geotechnics Slovak Academy of Sciences, Watsonova 45, 04001 Košice, Slovakia

<sup>2</sup> Institute of Material Science of Seville (Consejo Superior de Investigaciones Científicas/Seville University), Avenida Américo Vespucio 49, 41092 Seville, Spain

<sup>3</sup> Institute of Electronics and Photonics, Slovak University of Technology, Ilkovičova 3, 81219 Bratislava, Slovakia

\* Correspondence: dutkova@saske.sk; Tel.: +421-55-792-2606

### Particle size analysis of the used precursors

The particle size distribution of the precursors copper, bismuth and sulphur used for the mechanochemical synthesis of wittichenite  $\text{Cu}_3\text{BiS}_3$  nanocrystals is shown in Figure S1.

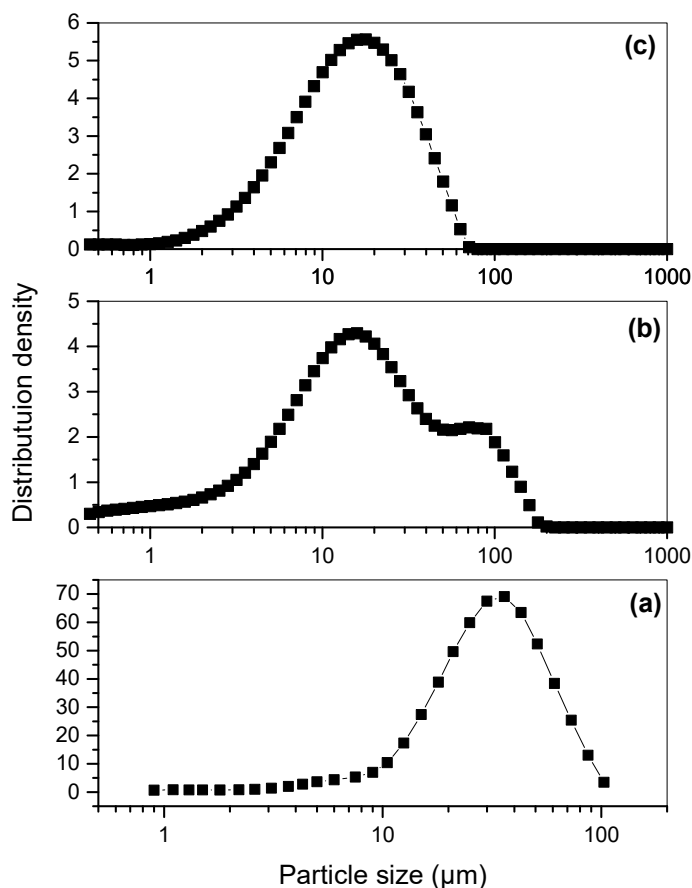

**Figure S1.** Particle size analysis of the used precursors: (a) Cu, (b) Bi, (c) S.

### Morphological characterization

The representative SEM image of mechanochemically synthesized  $\text{Cu}_3\text{BiS}_3$  after 5 min of milling showing several grains at lower magnification is displayed in Figure S2.

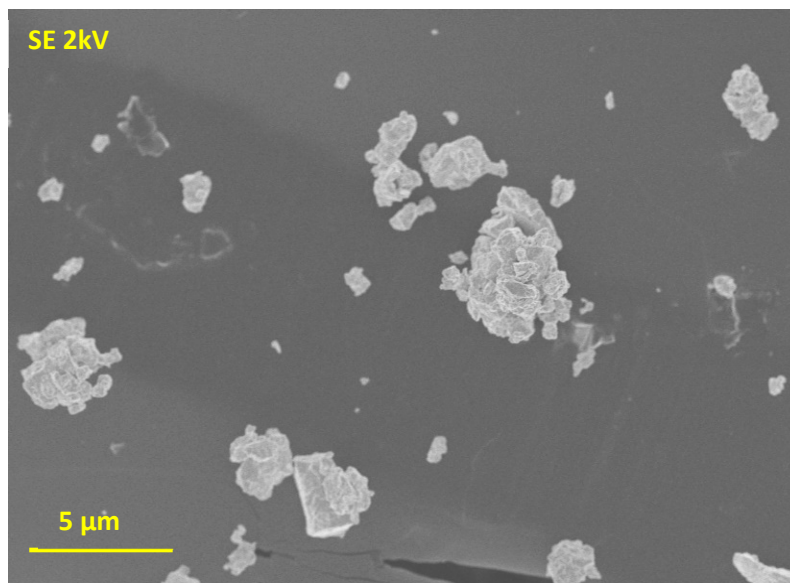

**Figure S2.** SEM image of mechanochemically synthesized  $\text{Cu}_3\text{BiS}_3$  after 5 min of milling at lower magnification
